# Supplementary material
Source: Springer Nature journal article supplement (https://www.springermedizin.de/resource/supplementary/12882_2010_183_MOESM1_ESM.pdf/9453224)

101 patients initiated RRT in the ICU  
from May 2007 until July 2008

7 Patients excluded because they did  
not meet criteria for AKI or were  
previously dialysis dependent

17 Patients excluded because  
death/withdrawal of care occurred  
within 48 hours of RRT initiation

77 Patients received at least 2 sessions  
of RRT for AKI

34 Patients were treated  
predominantly with IHD

30 Patients were treated  
predominantly with CRRT

13 Patients were treated  
predominantly with SLED

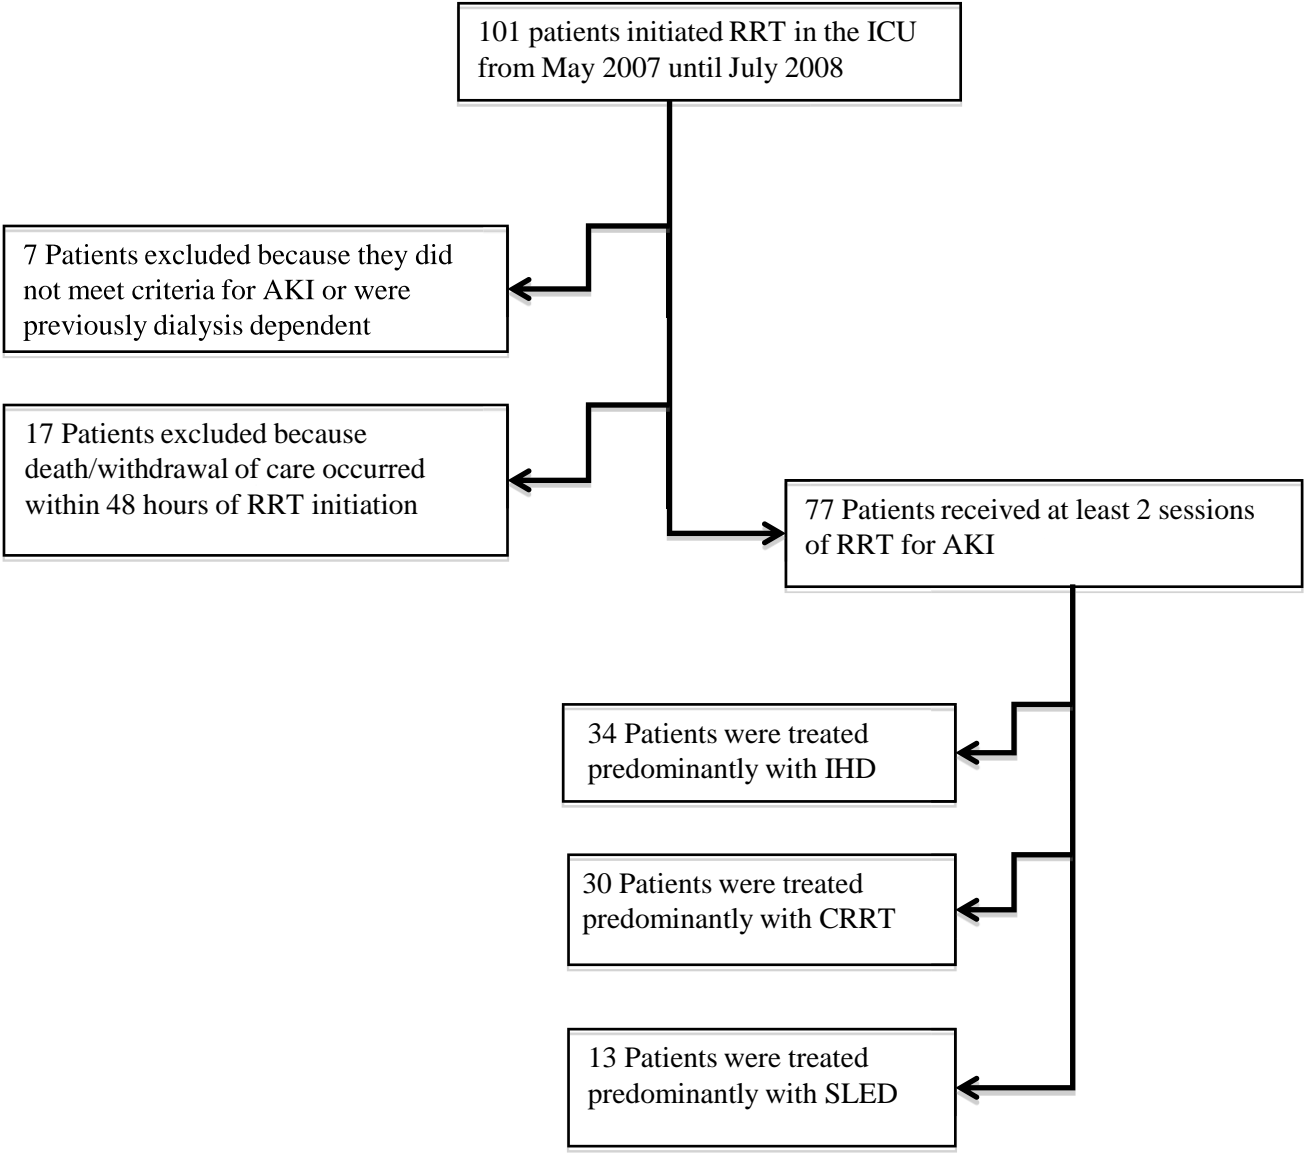

Supplement: MOESM1 [file 9453224]
